# Supplementary material for: Acquisition of extended spectrum beta-lactamase-producing enterobacteriaceae in neonates: A community based cohort in Madagascar
Source: PubMed Central journal article supplement (PMC5832238; doi:10.1371/journal.pone.0193325), 2018-03-01
Supplement: pone.0193325.s003.pdf [file pone.0193325.s003.pdf]

---

| <b>PATHOGENS</b>                   | <b>Frequency</b> | <b>%</b> |
|------------------------------------|------------------|----------|
| n= 83                              |                  |          |
| <i>Escherichia coli</i>            | 28               | 34.15    |
| <i>Klebsiella pneumoniae</i>       | 20               | 24.39    |
| <i>Enterobacter cloacae</i>        | 5                | 6.10     |
| <i>Acinetobacter baumannii</i>     | 7                | 8.54     |
| <i>Acinetobacter nosocomialis</i>  | 4                | 4.88     |
| <i>Acinetobacter guillouiae</i>    | 1                | 1.22     |
| <i>Acinetobacter calcoaceticus</i> | 1                | 1.22     |
| <i>Acinetobacter pitii</i>         | 1                | 1.22     |
| <i>Citrobacter freundii</i>        | 1                | 1.22     |
| <i>Klebsiella oxytoca</i>          | 1                | 1.22     |
| <i>Pichia norvegensis</i>          | 1                | 1.22     |
| <i>Kluyvera ascorbata</i>          | 1                | 1.22     |
| <i>Unidentified</i>                | 11               | 13.41    |
