# Supplementary material for: Acquisition of extended spectrum beta-lactamase-producing enterobacteriaceae in neonates: A community based cohort in Madagascar
Source: PubMed Central journal article supplement (PMC5832238; doi:10.1371/journal.pone.0193325), 2018-03-01
Supplement: pone.0193325.s004.pdf [file pone.0193325.s004.pdf]

---

| <b>PATHOGENS</b>                   | <b>Frequency</b> | <b>%</b> |
|------------------------------------|------------------|----------|
| n= 55                              |                  |          |
| <i>Escherichia coli</i>            | 17               | 30.91    |
| <i>Klebsiella pneumoniae</i>       | 14               | 25.45    |
| <i>Enterobacter cloacae</i>        | 2                | 3.64     |
| <i>Acinetobacter baumannii</i>     | 6                | 10.91    |
| <i>Acinetobacter nosocomialis</i>  | 3                | 5.45     |
| <i>Acinetobacter guillouiae</i>    | 1                | 1.82     |
| <i>Acinetobacter calcoaceticus</i> | 1                | 1.82     |
| <i>Acinetobacter pitii</i>         | 1                | 1.82     |
| <i>Citrobacter freundii</i>        | 1                | 1.82     |
| <i>Pichia norvegensis</i>          | 1                | 1.82     |
| <i>Acinetobacter ursigii</i>       | 1                | 1.82     |
| <i>Kluyvera ascorbata</i>          | 1                | 1.82     |
| <i>Unidentified</i>                | 6                | 10.91    |
