# Supplementary material for: Acquisition of extended spectrum beta-lactamase-producing enterobacteriaceae in neonates: A community based cohort in Madagascar
Source: PubMed Central journal article supplement (PMC5832238; doi:10.1371/journal.pone.0193325), 2018-03-01
Supplement: pone.0193325.s005.pdf [file pone.0193325.s005.pdf]

| ESBL Strains                 | RESISTANCES  |           |          |           |
|------------------------------|--------------|-----------|----------|-----------|
|                              | Distribution | *NAL Ac.  | CIPRO    | GENTA     |
| n= 83                        | n(%)         | n(%)      | n(%)     | n(%)      |
| <i>Escherichia coli</i>      | 28 (33.7)    | 13 (46.4) | 9 (32.1) | 10 (35.7) |
| <i>Klebsiella pneumoniae</i> | 20 (24.1)    | 5 (25.0)  | 7 (35.0) | 12 (60.0) |
| <i>Enterobacter cloacae</i>  | 5 (6.0)      | 2 (40.0)  | 2 (40.0) | 2 (40.0)  |
| <i>Acinetobacter spp.</i>    | 15 (18.1)    | 6 (40.0)  | 7 (46.7) | 8 (53.3)  |
| <i>Citrobacter freundii</i>  | 1 (1.2)      | 0 (0.0)   | 0 (0.0)  | 0 (0.0)   |
| <i>Klebsiella oxytoca</i>    | 1 (1.2)      | 0 (0.0)   | 0 (0.0)  | 0 (0.0)   |
| <i>Pichia norvegensis</i>    | 1 (1.2)      | 0 (0.0)   | 0 (0.0)  | 1 (100)   |
| <i>Kluyvera ascorbata</i>    | 1 (1.2)      | 0 (0.0)   | 0 (0.0)  | 0 (0.0)   |
| <i>Unidentified</i>          | 11 (13.3)    | 2 (18.2)  | 2 (18.2) | 5 (45.5)  |

\*NAL Ac. : Nalidixic Acid, CIPRO: Ciprofloxacin, GENTA: Gentamicin
