# Supplementary material for: Acquisition of extended spectrum beta-lactamase-producing enterobacteriaceae in neonates: A community based cohort in Madagascar
Source: PubMed Central journal article supplement (PMC5832238; doi:10.1371/journal.pone.0193325), 2018-03-01
Supplement: pone.0193325.s006.pdf [file pone.0193325.s006.pdf]

| PATHOGENS                    | Distribution | RESISTANCES |           |           |
|------------------------------|--------------|-------------|-----------|-----------|
|                              |              | *Ac. NAL    | CIPRO     | GENTA     |
| n= 57                        | n(%)         | n(%)        | n(%)      | n(%)      |
| <i>Escherichia coli</i>      | 28 (49.1)    | 12 (42.9)   | 10 (35.7) | 15 (53.6) |
| <i>Klebsiella pneumoniae</i> | 6 (10.5)     | 2 (33.3)    | 2 (33.3)  | 3 (50)    |
| <i>Enterobacter cloacae</i>  | 3 (5.3)      | 3 (100)     | 3 (100)   | 3 (100)   |
| <i>Acinetobacter spp.</i>    | 6 (10.5)     | 2 (33.3)    | 2 (33.3)  | 4 (66.7)  |
| <i>Unidentified</i>          | 14 (24.6)    | 8 (57.1)    | 6 (42.9)  | 6 (42.9)  |

\*NAL Ac. : Nalidixic Acid, CIPRO: Ciprofloxacin, GENTA: Gentamicin
